# Supplementary material
Source: Springer Nature journal article supplement (https://www.springermedizin.de/resource/supplementary/12902_2014_233_MOESM1_ESM.pdf/9515816)

## Additional file 1

Clinical measurements provided on the platform are the following, as also can be seen in the figure below: HbA1c, blood pressure, lipid profile, Cockcroft, alb/kreat ratio, smoking, length, weight and BodyMass Index (BMI).

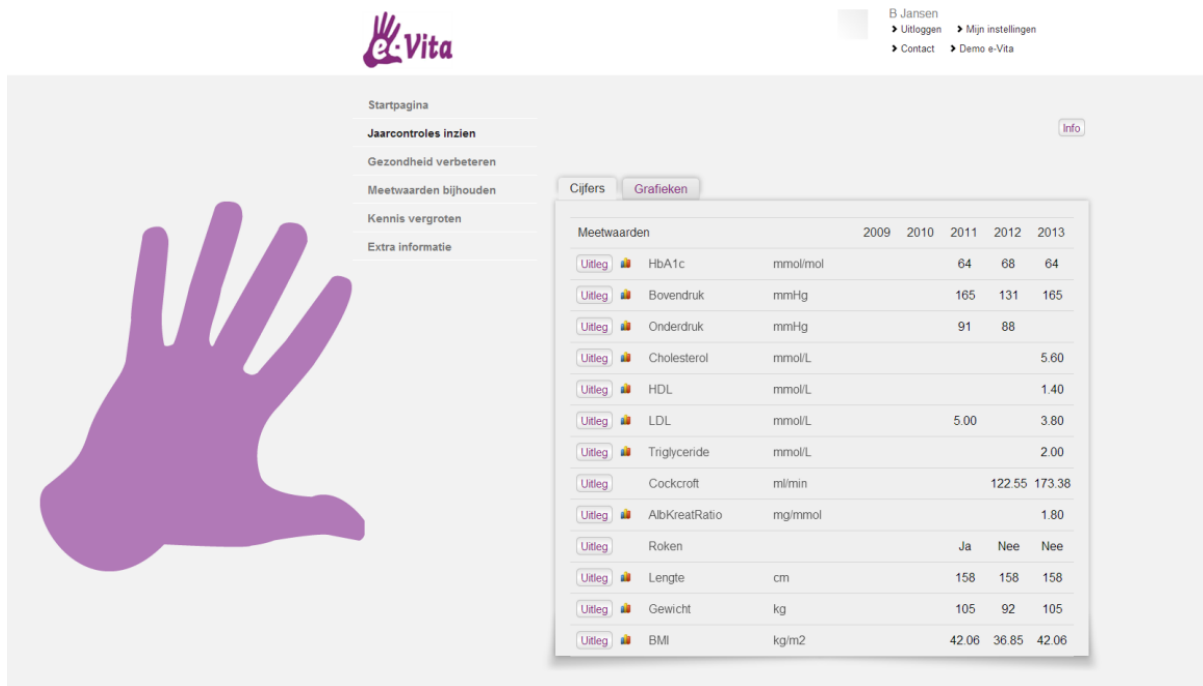

Supplement: MOESM1 [file 9515816]
